# Supplementary material for: miR-146b-5p Enhances the Sensitivity of NSCLC to EGFR Tyrosine Kinase Inhibitors by Regulating the IRAK1/NF-κB Pathway
Source: PubMed Central journal article supplement — Mol Ther Nucleic Acids. 2020 Sep 16;22:471–83. doi: 10.1016/j.omtn.2020.09.015 (PMC7554328; doi:10.1016/j.omtn.2020.09.015), 2020-09-16
Supplement: mmc1.pdf [file mmc1.pdf]

OMTN, Volume 22

## **Supplemental Information**

### **miR-146b-5p Enhances the Sensitivity of NSCLC to EGFR Tyrosine Kinase Inhibitors by Regulating the IRAK1/NF- $\kappa$ B Pathway**

**Yi-Nan Liu, Meng-Feng Tsai, Shang-Gin Wu, Tzu-Hua Chang, Tzu-Hsiu Tsai, Chien-Hung Gow, Hsin-Yi Wang, and Jin-Yuan Shih**

## Supporting Information:

Supplementary Table S1. miRNAs showing differential expression in PC9 versus PC9/gef lung cancer cells, as evaluated with TaqMan Array Human MicroRNA A+B Cards Set (submitted as a separate file)

Supplementary Table S2. miRNAs showing differential expression in HCC827 versus HCC827/gef lung cancer cells, as evaluated with TaqMan Array Human MicroRNA A+B Cards Set (submitted as a separate file)

### Supplementary Table S3: Clinical characteristics of the 30 lung adenocarcinoma patients with malignant pleural effusions

|                                     | Pleural effusion    |                     |                            | <i>P</i> *         |
|-------------------------------------|---------------------|---------------------|----------------------------|--------------------|
|                                     | Patient No.         | Before treatment    | Acquired resistance to TKI |                    |
| <b>Total No.</b>                    | 30                  | 15                  | 15                         |                    |
| <b>Age, median years</b><br>(range) | 66.1<br>(29.5-88.0) | 68.9<br>(42.6-88.0) | 63.8<br>(29.5-85.3)        | 0.567 <sup>#</sup> |
| <b>Sex</b>                          |                     |                     |                            | 0.710              |
| <b>Female</b>                       | 18                  | 10                  | 8                          |                    |
| <b>Male</b>                         | 12                  | 5                   | 7                          |                    |
| <b>Smoking</b>                      |                     |                     |                            | 1.000              |
| <b>Nonsmokers</b>                   | 24                  | 12                  | 12                         |                    |
| <b>Smokers</b>                      | 6                   | 3                   | 3                          |                    |
| <b>ECOG PS<sup>#</sup></b>          |                     |                     |                            | 1.000              |
|                                     |                     |                     | 2                          |                    |
| <b>EGFR</b>                         |                     |                     |                            | 0.311              |
| <b>Del-19</b>                       | 12                  | 4                   | 8                          |                    |
| <b>L858R</b>                        | 16                  | 10                  | 6                          |                    |
| <b>other</b>                        | 2                   | 1 <sup>©</sup>      | 1 <sup>*</sup>             |                    |

\* by Fisher's exact test; <sup>#</sup>by Mann-Whitney Test

© G719A; \*L858R+R776H

<sup>#</sup> Eastern Cooperative Oncology Group, performance status

**Supplementary Table S4: EGFR mutations and IC<sub>50</sub> values for osimertinib of lung cancer cells which were isolated from patients' pleural effusions**

| <b>Cancer cell</b> | <b>Treatment duration (months)</b> | <b>EGFR mutation</b> | <b>IC<sub>50</sub> of osimertinib (μM)</b> |
|--------------------|------------------------------------|----------------------|--------------------------------------------|
| PE2988             | 5                                  | del E746-A750+T790M  | 4.53                                       |
| PE3479             | 14                                 | L858R+T790M+C797S    | 1.31                                       |

**Supplementary Table S5: Potential targets of miR-146b-5p using TargetScan software**

| <b>Target gene</b> | <b>Conserved sites total</b>        | <b>Conserved 8mer sites</b>        | <b>Conserved 7mer-m8 sites</b>        | <b>Conserved 7mer-A1 sites</b>        |
|--------------------|-------------------------------------|------------------------------------|---------------------------------------|---------------------------------------|
| TRAF6              | 3                                   | 3                                  | 0                                     | 0                                     |
| ST5                | 3                                   | 0                                  | 2                                     | 1                                     |
| IRAK1              | 2                                   | 2                                  | 0                                     | 0                                     |
| ACKR2              | 2                                   | 2                                  | 0                                     | 0                                     |
| CDKN2AIP           | 2                                   | 1                                  | 1                                     | 0                                     |
| NOVA1              | 2                                   | 1                                  | 1                                     | 0                                     |
| KLF7               | 2                                   | 1                                  | 1                                     | 0                                     |
| MED1               | 2                                   | 1                                  | 1                                     | 0                                     |
| VPS52              | 2                                   | 0                                  | 2                                     | 0                                     |
| ZNRF3              | 2                                   | 0                                  | 1                                     | 1                                     |
| LRRC15             | 2                                   | 0                                  | 2                                     | 0                                     |
| PRX                | 2                                   | 0                                  | 2                                     | 0                                     |
| MYO5A              | 2                                   | 0                                  | 1                                     | 1                                     |
| ATG7               | 2                                   | 0                                  | 0                                     | 2                                     |
| <b>Target gene</b> |                                     |                                    |                                       |                                       |
|                    | <b>Poorly conserved sites total</b> | <b>Poorly conserved 8mer sites</b> | <b>Poorly conserved 7mer-m8 sites</b> | <b>Poorly conserved 7mer-A1 sites</b> |
| EGFR               | 3                                   | 1                                  | 1                                     | 1                                     |

**Supplementary Table S6: Clinical characteristics of the 74 lung adenocarcinoma patients with malignant pleural effusions**

|                                  |                   | <b>Pleural effusion</b> |                         |                                   |                 |
|----------------------------------|-------------------|-------------------------|-------------------------|-----------------------------------|-----------------|
|                                  |                   | <b>Patient No.</b>      | <b>Before treatment</b> | <b>Acquired resistance to TKI</b> | <b><i>P</i></b> |
| <b>Total No.</b>                 |                   | 74                      | 40                      | 34                                |                 |
| <b>Age, median years (range)</b> |                   | 65.7 (29.5-89.4)        | 66.8 (32.7-89.4)        | 64.7 (29.5-89.4)                  | 0.389           |
| <b>Sex</b>                       |                   |                         |                         |                                   | 0.326           |
|                                  | <b>Female</b>     | 50                      | 29                      | 21                                |                 |
|                                  | <b>Male</b>       | 24                      | 11                      | 13                                |                 |
| <b>Smoking</b>                   |                   |                         |                         |                                   | 0.359           |
|                                  | <b>Nonsmokers</b> | 61                      | 31                      | 30                                |                 |
|                                  | <b>Smokers</b>    | 13                      | 9                       | 4                                 |                 |
| <b>ECOG PS</b>                   |                   |                         |                         |                                   | 0.496           |
|                                  | <b>0-1</b>        | 47                      | 24                      | 23                                |                 |
|                                  | <b>2-4</b>        | 27                      | 16                      | 11                                |                 |
| <b>EGFR mutation</b>             |                   |                         |                         |                                   | 0.585           |
|                                  | <b>Del-19</b>     | 41                      | 21                      | 20                                |                 |
|                                  | <b>L858R</b>      | 33                      | 19                      | 14                                |                 |

**Supplementary Table S7: List of primers**

| <b>Gene</b> | <b>Primer</b>                 |
|-------------|-------------------------------|
| EGFR-F      | 5'- CGCAAAGGGCATGAACTACTT-3'  |
| EGFR-R      | 5'- CTTGACATGCTGCGGTGTTT-3'   |
| TRAF6-F     | 5'- TTTTGGTTGCCATGAAAAGA-3'   |
| TRAF6-R     | 5'-TTCTCATGTGTGACTGGGTGT-3'   |
| IRAK1-F     | 5'-GAGACCTTGGCTGGTCAGAG-3'    |
| IRAK1-R     | 5'-GTGCTTCTCAAAGCCACTCC-3'    |
| IL6-F       | 5'-TCAGCCCTGAGAAAGGAGACAT-3'  |
| IL6-R       | 5'-CATCCATCTTTTTCAGCCATCTT-3' |
| IL8-F       | 5'-ACTCAAACCTTTCCACCC-3'      |
| IL8-R       | 5'-AAACTTCTCCACAACCTCTG-3'    |
| TBP-F       | 5'-CACGAACCACGGCACTGATT-3'    |
| TBP-R       | 5'-TTTTCTTGCTGCCAGTCTGGAC-3'  |

**Supplementary Table S8: Antibodies and plasmids used in the study**

| <b>Name</b>              | <b>Company</b>            | <b>Catalog number</b> |
|--------------------------|---------------------------|-----------------------|
| PARP                     | Cell Signaling Technology | #9542                 |
| Caspase-3                | Cell Signaling Technology | #9662                 |
| TRAF6                    | Cell Signaling Technology | #8028s                |
| IRAK1                    | Cell Signaling Technology | #4504s                |
| Phospho-EGFR (Tyr1045)   | Cell Signaling Technology | #2237                 |
| EGFR                     | Santa Cruz Biotechnology  | #sc-03                |
| $\beta$ -actin           | Millipore                 | #MAB1501              |
| $\alpha$ -tubulin        | Millipore                 | #04-1117              |
| NF- $\kappa$ B p65       | Cell Signaling Technology | #8242                 |
| NF- $\kappa$ B1 p105/p50 | Cell Signaling Technology | #12540                |
| Lamin B                  | Santa Cruz                | #sc-6210              |
| IRAK1-3'UTR-WT reporter  | Addgene                   | #15095                |
| IRAK1-3'UTR-Mut reporter | Addgene                   | #15096                |

## Supplementary Figure

Figure S1

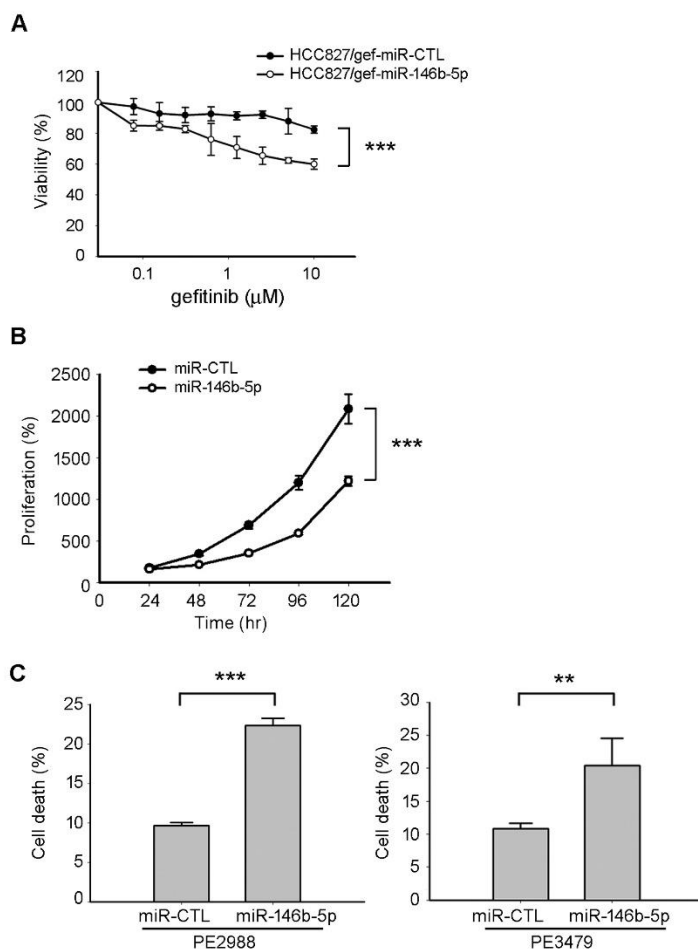

**Supplementary Fig. S1. The effect of miR-146b-5p on gefitinib-induced cell death and proliferation.** (A) HCC827/gef cells were transfected with miR-Ctl (scrambled control) or miR-146b-5p mimic and incubated for 24 h, followed by treatment with the indicated concentrations of gefitinib. Cell viability was assessed using the MTT assay as described in "Materials and Methods". (B) PC9/gef cells were plated overnight, and then transiently transfected with miR-Ctl or miR-146b-5p. The day of transfection was set as "0" and the growth of cells was determined at the indicated time points by MTT assay. (C) After transfection with miR-Ctl (scrambled control) or miR-146b-5p mimic, the ratio of apoptotic cells was analyzing by annexinV assays.



**Figure S2**

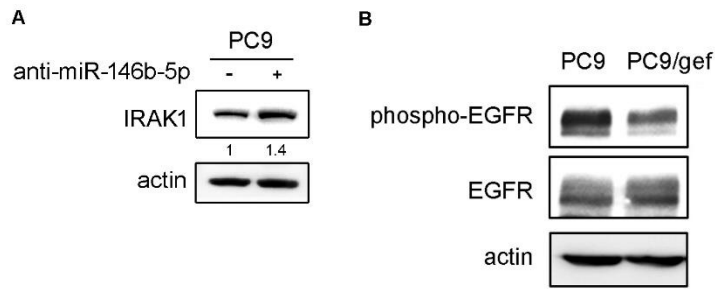

**Supplementary Fig. S2. Expression of downstream targets of miR-146b-5p.** (A)

The expression levels of the IRAK1 protein after transfection of anti-miR-Ctl or anti-miR-146b-5p inhibitor in PC9 cells. (B) The phospho-EGFR and EGFR expressions were detected using and immunoblotting.

**Figure S3**

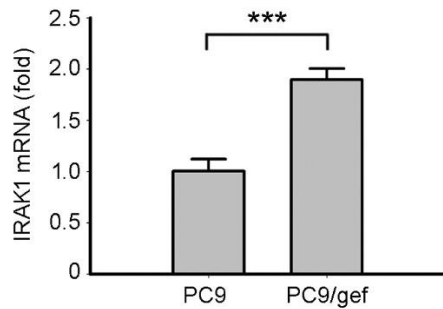

**Supplementary Fig. S3. IRAK1 expression.** The levels of *IRAK1* mRNA were detected using RT-qPCR.

**Figure S4**

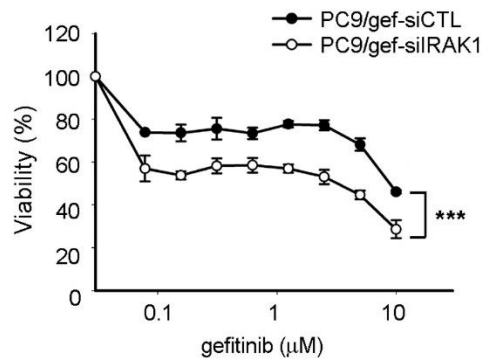

**Supplementary Fig. S4. *IRAK1* knockdown enhanced gefitinib-mediated cell death.**

PC9/gef cells were transfected with siCTL (scrambled control) or si*IRAK1* for 24 h, and then treated with the indicated concentrations of gefitinib for 72 h. Cell viability was assessed using the MTT assay as described in the "Materials and Methods".

## Figure S5 (refer to Figure 2)

(refer to Fig. 2C)

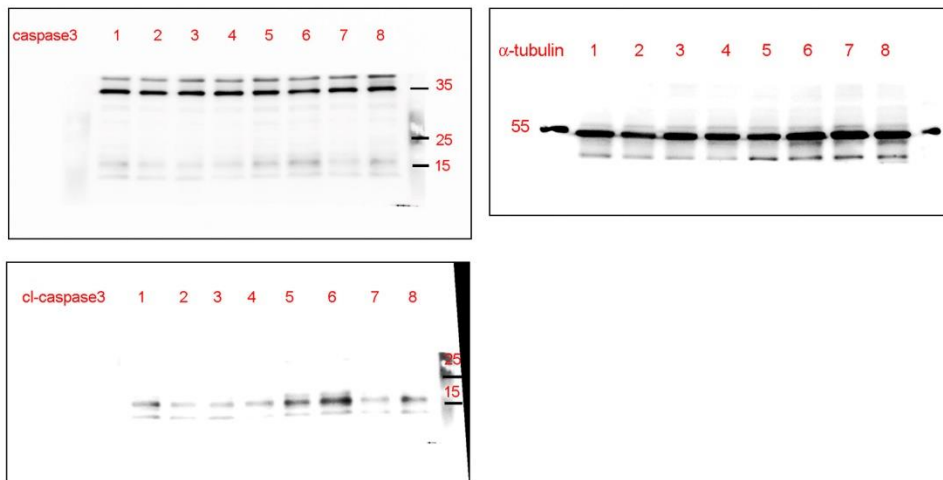

(refer to Fig. 2E)

(Fig. 2E, left)

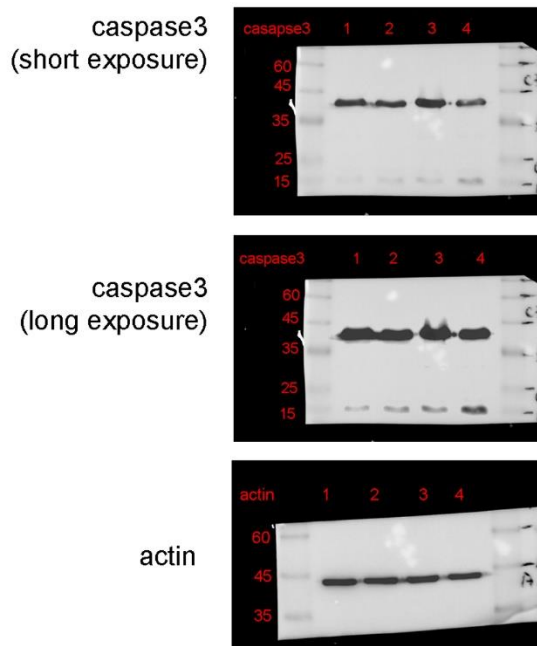

(Fig. 2E, right)

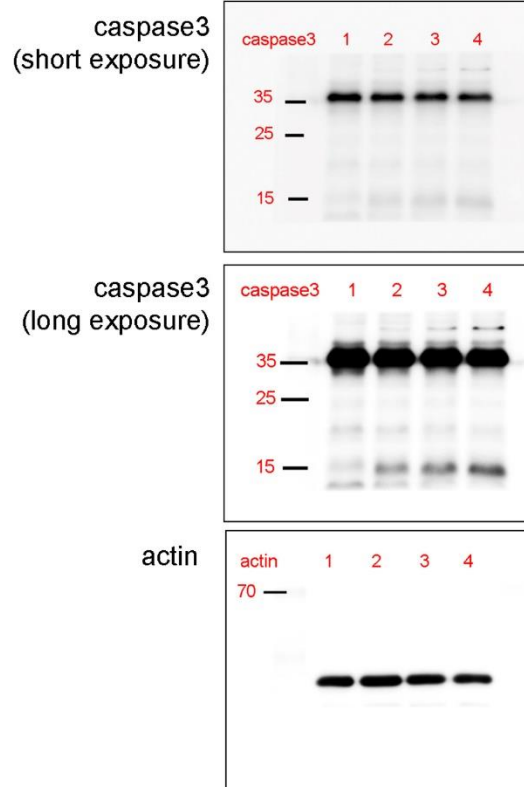

Supplementary Fig. S5. Original films refer to figure 2C and 2E.

**Figure S6 (refer to Figure 3)**

(refer to Fig.3B, left)

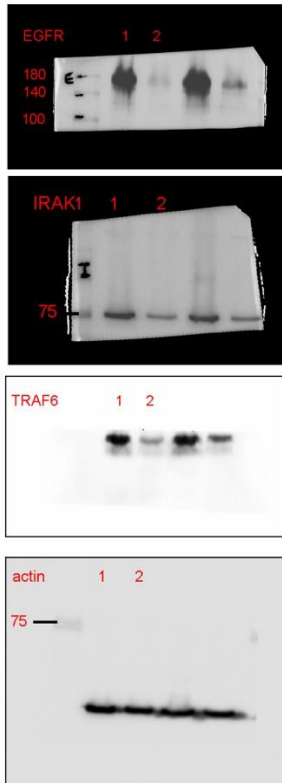

(refer to Fig.3B, middle)

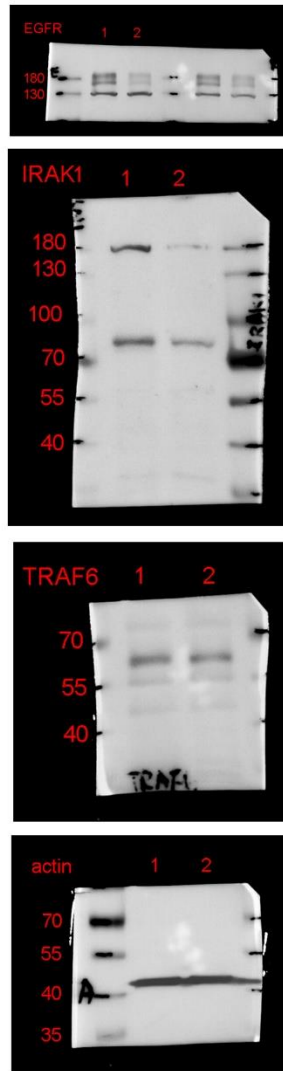

(refer to Fig.3B, right)

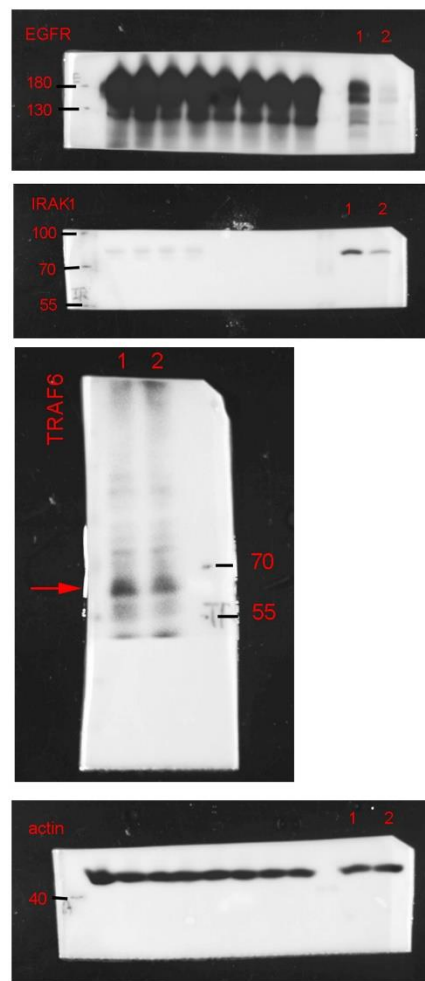

(refer to Fig.3C, left)

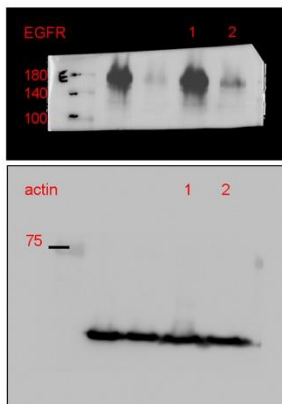

(refer to Fig.3C, middle)

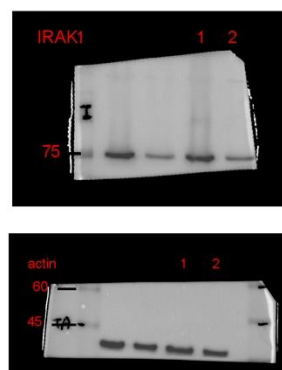

(refer to Fig.3C, right)

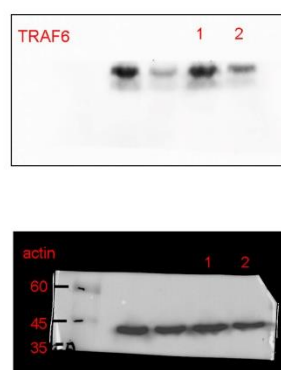

**Supplementary Fig. S6. Original films refer to figure 3B and 3C.**

**Figure S7 (refer to Figure 3)**

(refer to Fig. 3C)

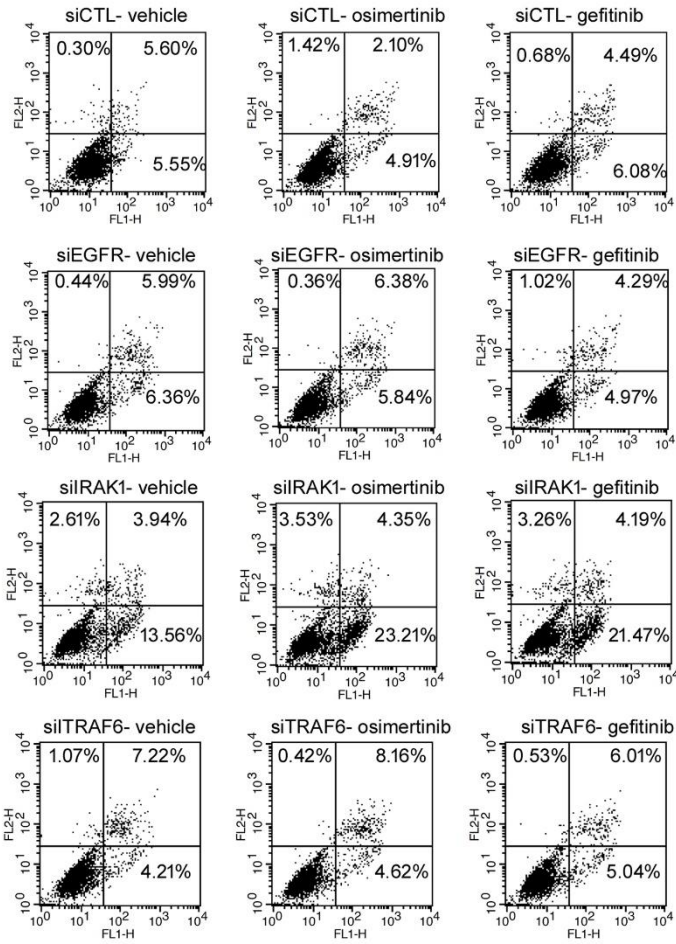

(refer to Fig. 3C)

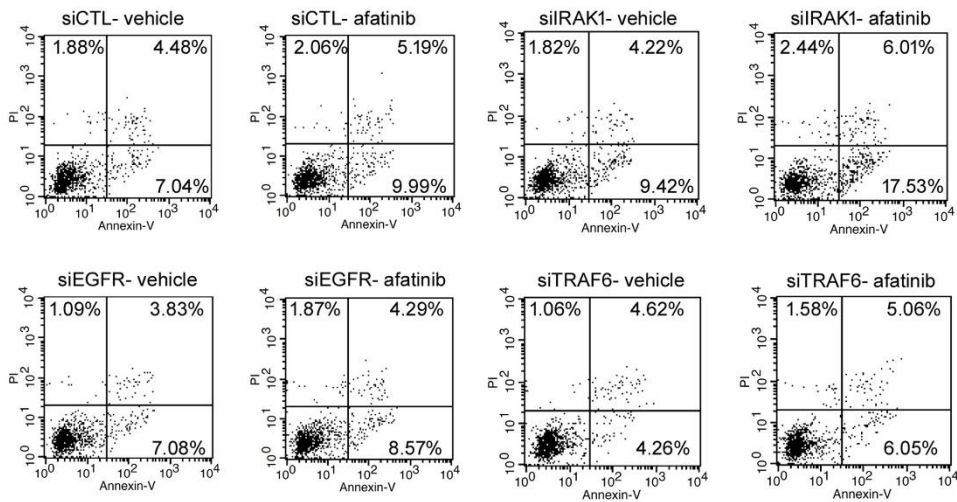

**Supplementary Fig. S7. Original dot plots refer to figure 3C.**

**Figure S8 (refer to Figure 4)**

(refer to Fig. 4A)

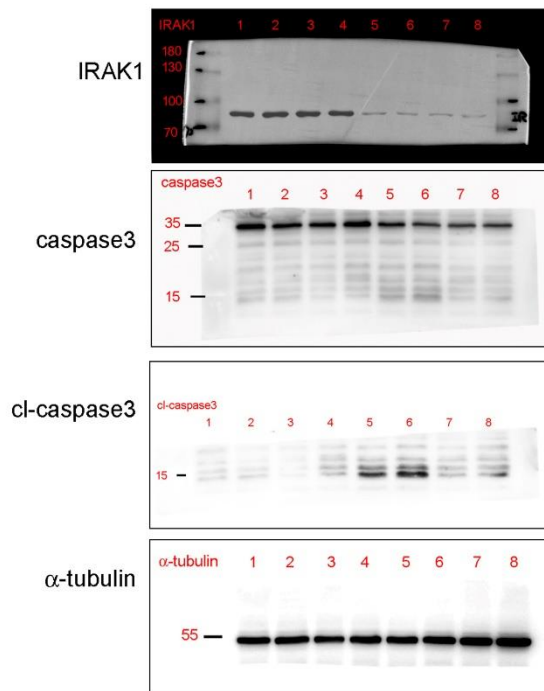

(refer to Fig. 4B, left)

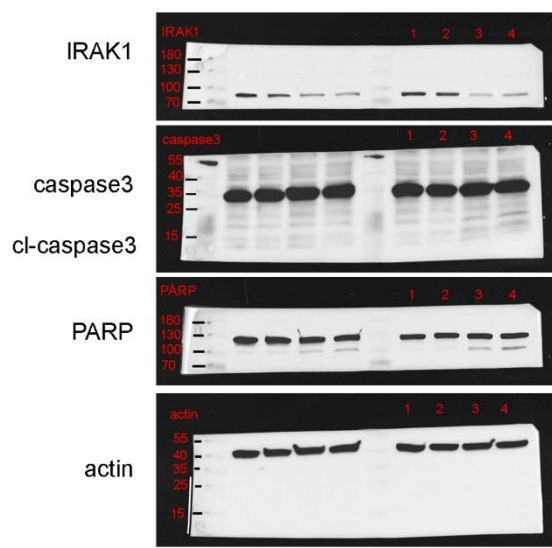

(refer to Fig. 4B, right)

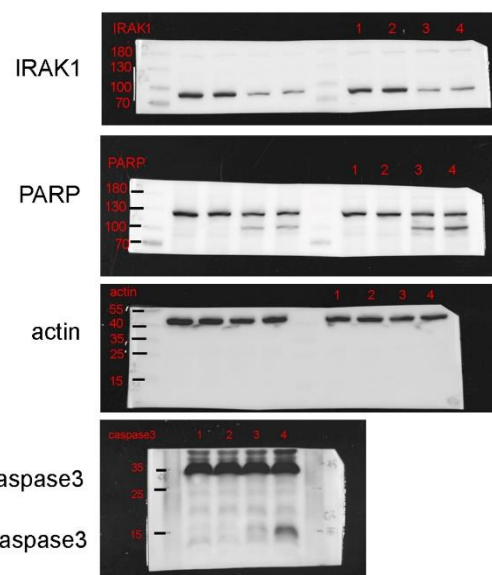

**Supplementary Fig. S8. Original films refer to figure 4A and 4B.**

**Figure S9 (refer to Figure 5)**

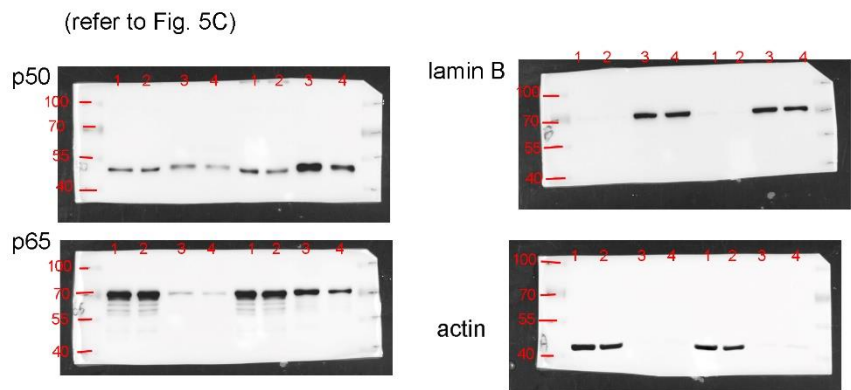

**Supplementary Fig. S9. Original films refer to figure 5C.**

**Figure S10 (refer to Figure 6)**

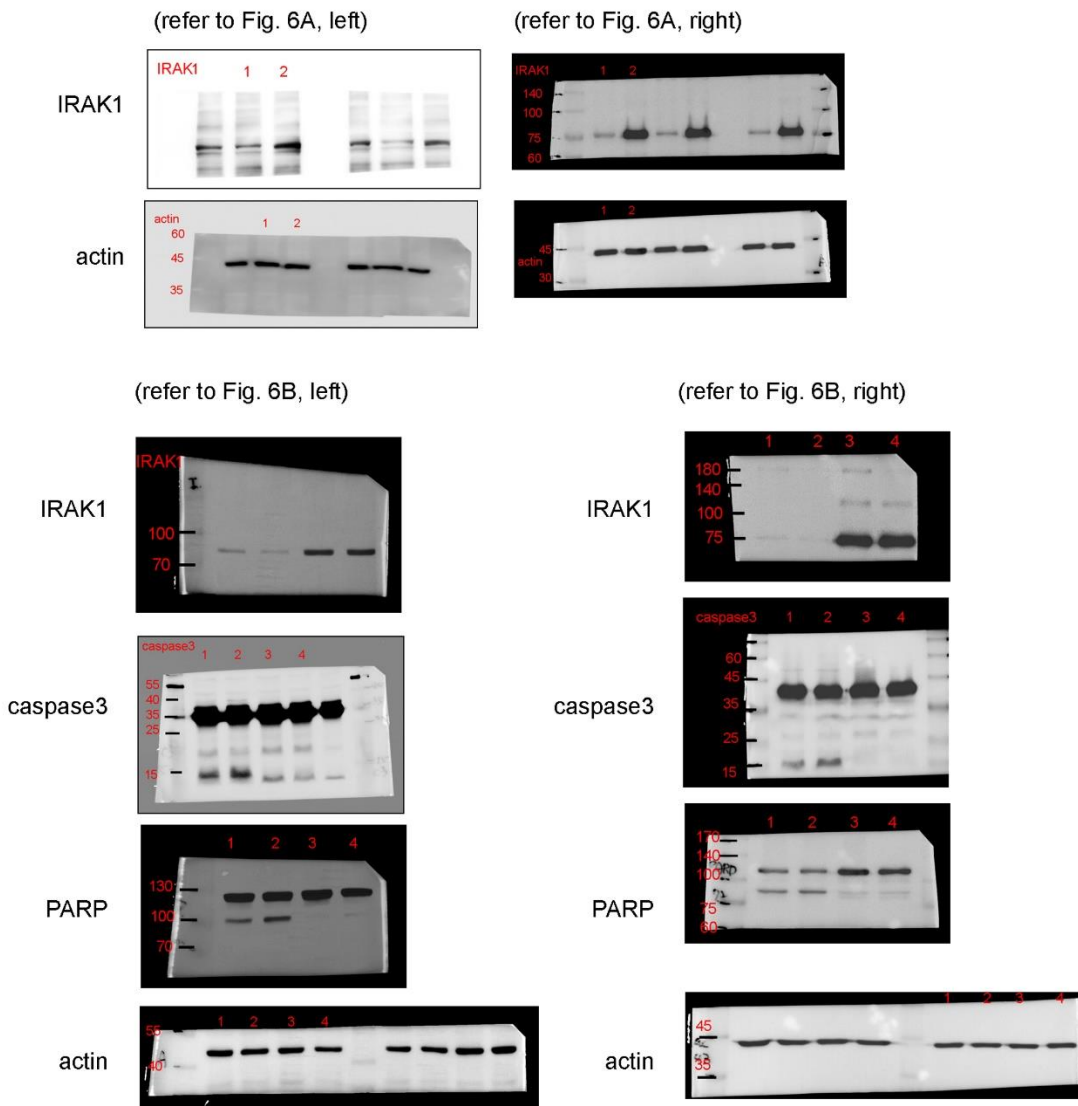

**Supplementary Fig. S10. Original films refer to figure 6A and 6B.**
